# Supplementary material for: Activatable ultrasmall gold nanorods for “off–on” fluorescence imaging-guided photothermal therapy
Source: Royal Society of Chemistry journal article supplement (doi:10.1039/c6tb02873j), 2017-01-01
Supplement: c6tb02873j1.pdf [file c6tb02873j1.pdf]

### †Electronic Supplementary Information (ESI)

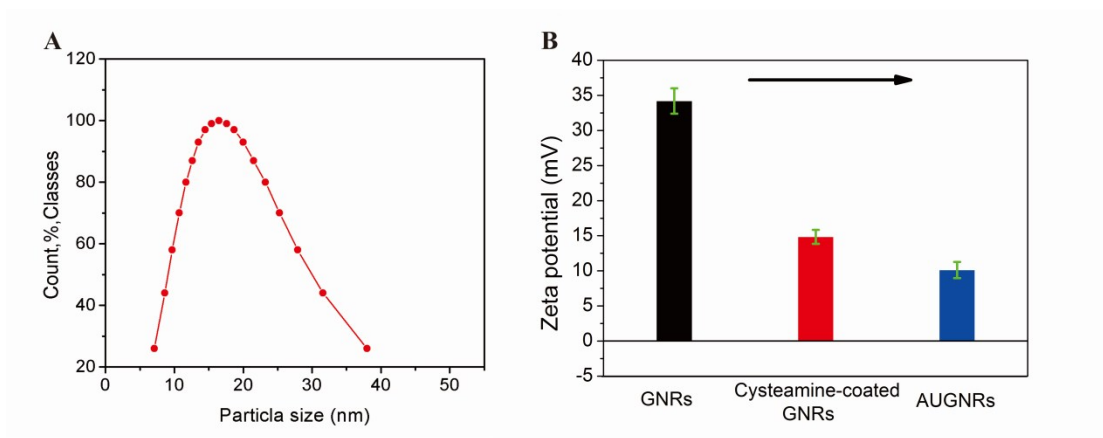

**Figure S1.** Dynamic light scattering (DLS) of the AUGNRs (A) and zeta potentials of GNRs, cysteamine-coated GNRs, and AUGNRs (B).

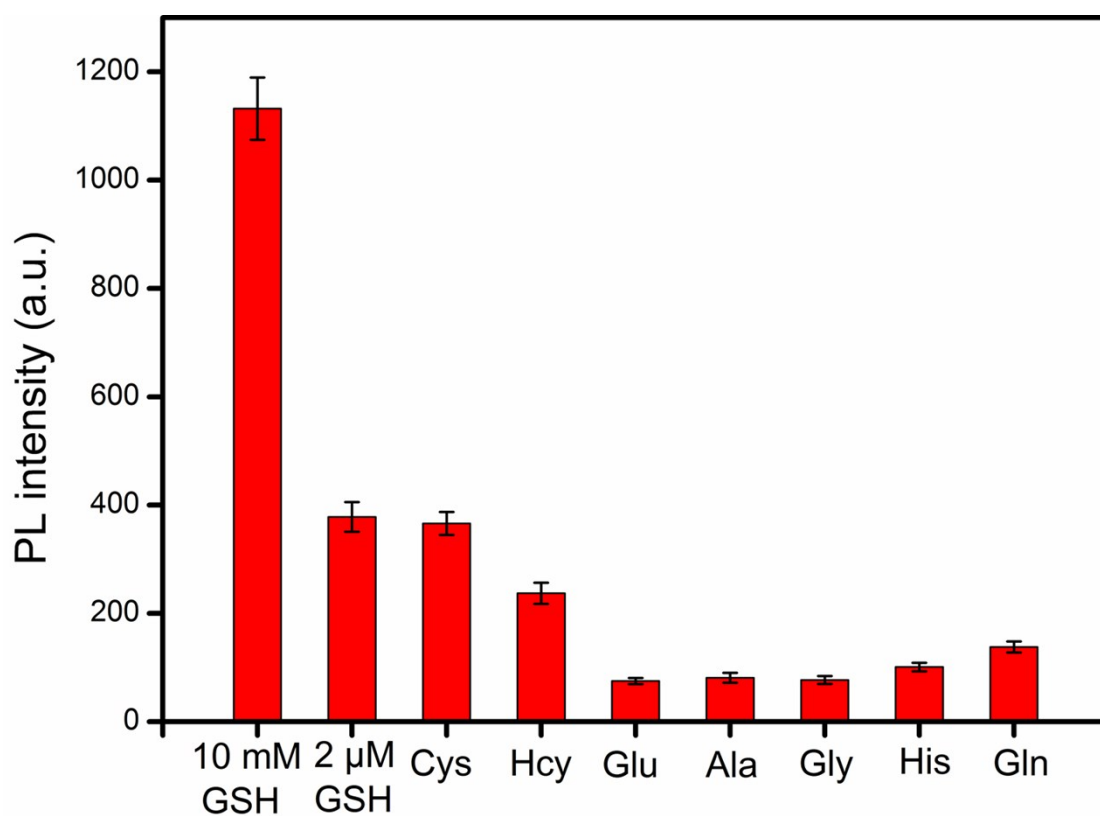

**Figure S2:** Fluorescence intensity of AUGNRs mixed with 10 mM of glutathione (GSH), 2 μM of GSH, cysteine (Cys), homocysteine (Hcy), glucose (Glu), alanine (Ala), Glutamine (Gly), histidine (His) and glutamic acid (Gln), respectively.

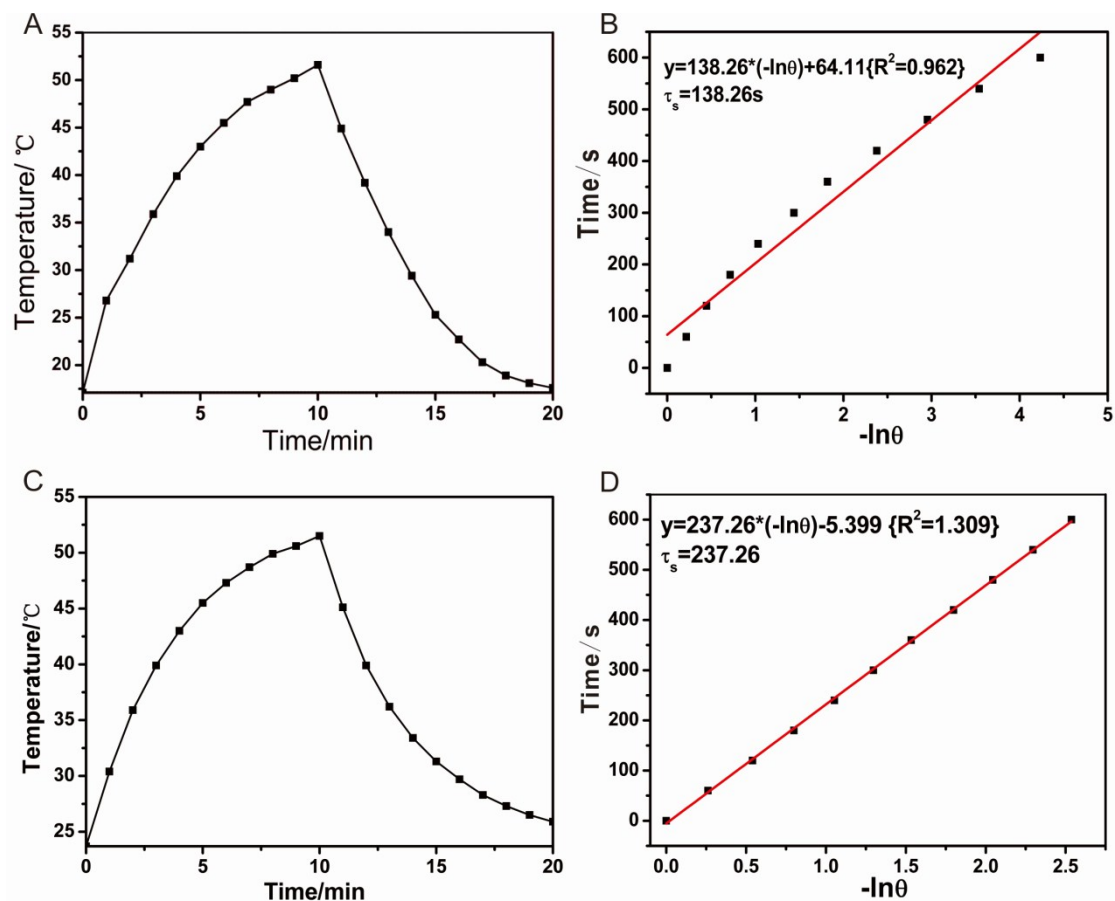

**Figure S3.** Heating/Cooling experiment of 200  $\mu\text{g/mL}$  ultrasmall GNRs (A) and large size GNRs (C) aqueous solution with exposure of 1.5  $\text{W/cm}^2$  808 nm laser irradiation. The continuous wave (CW) laser was switched off after 10 min and the cooling rate was recorded. (B), (D): Plot of time versus negative natural logarithm of the temperature increment for the cooling cycle (after 10 min in A, C). The linear fit of the data points results in a half-life time  $\tau_s$  are 138.26 s and 237.26s respectively.

The photothermal efficiency  $\eta$  can be calculated by eq. (1) as reported by Roper *et al.*:<sup>[1]</sup>

$$\eta = \frac{hS(T_{\max} - T_{\text{sur}}) - Q_{\text{diss}}}{I(1 - 10^{-A_{808}})} \quad (1)$$

Where

$$hS = \frac{\sum_i m_i c_{pi}}{\tau_s} \quad (2)$$

With

$$\tau_s = -\ln\theta \quad (3)$$

And

$$\theta = \frac{T(t) - T_{\text{sur}}}{T_{\text{max}} - T_{\text{sur}}} \quad (4)$$

The half-life time  $\tau_s$  is the slope of the linear fit of the experimental data plotted in Figure S2B ( $t$  vs.  $-\ln\theta$ ). With values of  $m = 0.3$  g and  $C_p = 4.2$  J/g·K in eq. (2) and with  $\tau_s = 138.26$  s,  $T_{\text{max}} = 51.43$  °C,  $hS$  (eq. (2)) is equal to 0.3144W/K.  $Q_{\text{diss}}$  was individually calculated to be 0.0126 W.

With the previously measured extinction coefficient at 808 nm, the  $A_{808} = 0.8$ . With an incident laser power of  $I = 1.5$  W cm<sup>-2</sup>, the photothermal efficiency was calculated with eq. (1) to be 24%.

In the same method, the photothermal efficiency of large size GNRs was 17%.

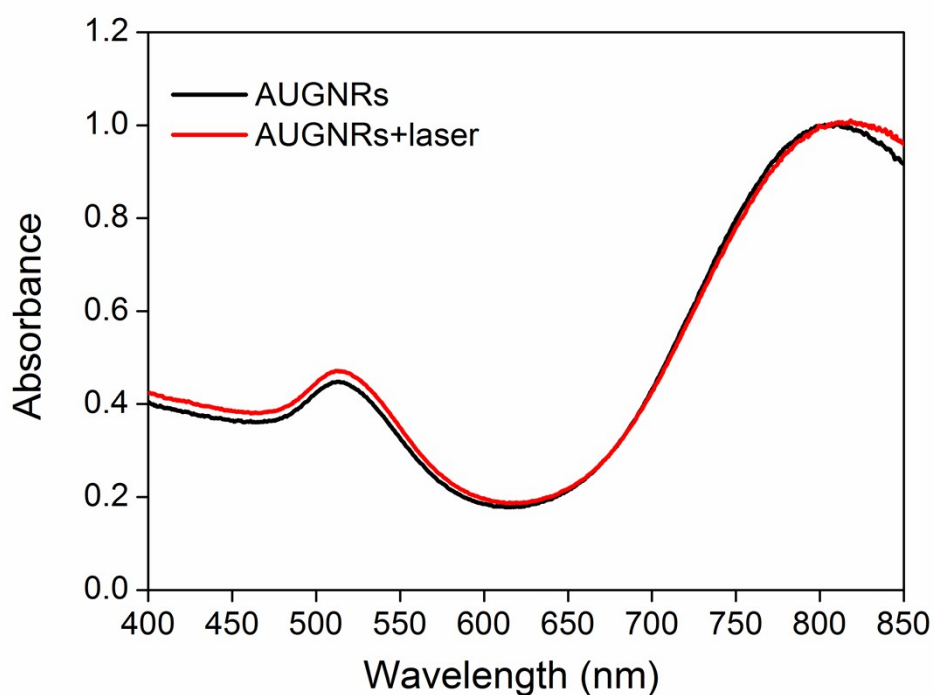

**Figure S4.** UV-vis-NIR absorbance spectra of AUGNRs with or without irradiation.

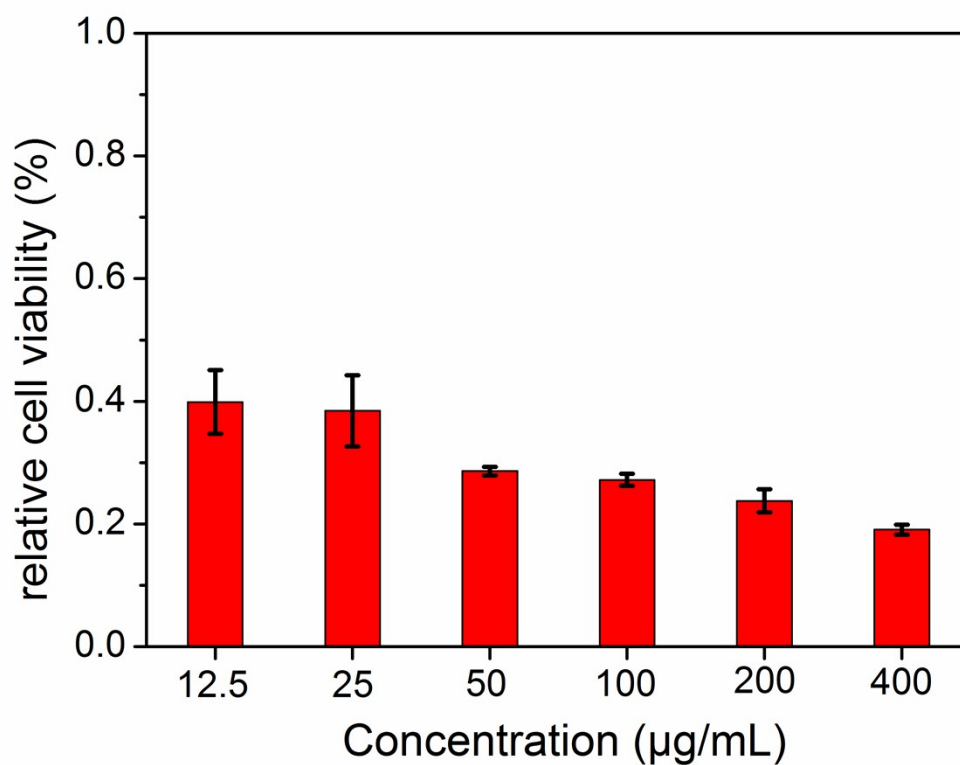

**Figure S5.** Relative cell viability of CTAB-coated ultrasmall GNRs. Error bars show standard deviations (n=5).

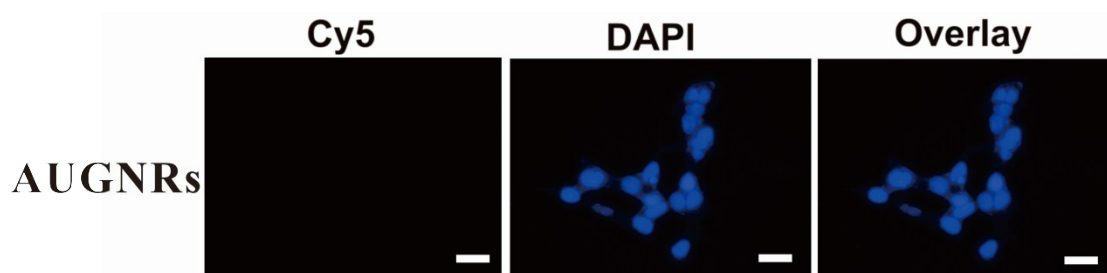

**Figure S6:** Fluorescence images analyses of 293T cells incubated with the AUGNRs for 1 h. All scale bars are 10 µm.

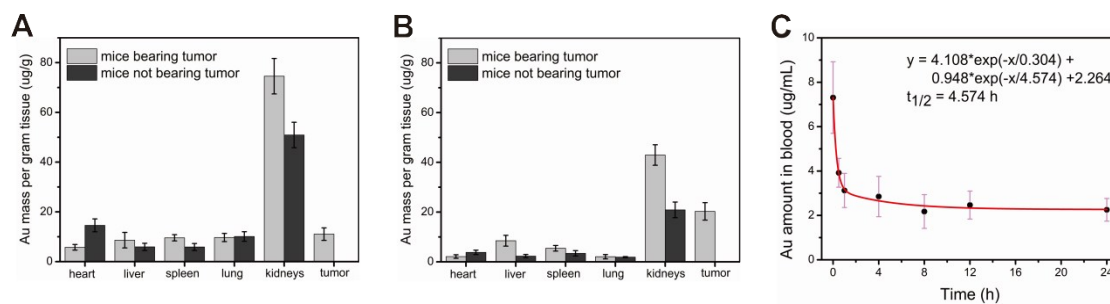

**Figure S7:** Biodistribution of AUGNRs in Balb/c mice bearing or not bearing tumors at day 1 (A) and

day 7 (B) postinjection measured by inductively coupled plasma atomic emission spectrometric (ICP-AES) analysis of Au in different organs and tissues (n=3). (C) the blood half-life of AUGNRs in Balb/c mice not bearing tumors.
